# Supplementary material for: Transportin-SR Is Required for Proper Splicing of Resistance Genes and Plant Immunity
Source: PLOS journal article supplement (doi:10.1371/journal.pgen.1002159), 2011-06-30
Supplement: S2 (10.1371/journal.pgen.1002159.s002) [file journal.pgen.1002159.s002]

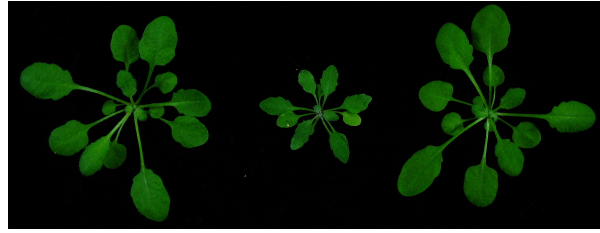

WT

*mos14-1*

*pMOS14:MOS14* in *mos14-1*
